# Supplementary material for: High Throughput Manufacturing of Bio-Resorbable Micro-Porous Scaffolds Made of Poly(L-lactide-co-ε-caprolactone) by Micro-Extrusion for Soft Tissue Engineering Applications
Source: MDPI journal article supplement (doi:10.3390/polym12010034), 2019-12-24
Supplement: s1 [file s1]

Supplementary material:

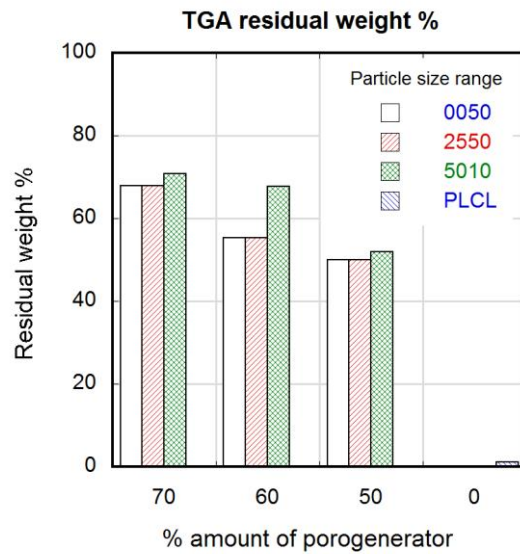

**Figure S1.** Percentual residual weight measured by TGA for samples containing different particle sizes (white 0–50 μm, upwards stripe pattern 25–50 μm, cross pattern 50–100 μm, downwards strip pattern neat PLCL) as a function of the theoretical percental amount of porogenerator.

$$\varphi_v = \frac{\rho_m}{\rho_p} \cdot \frac{\varphi_w}{1 + \varphi_w \left( \frac{\rho_m}{\rho_p} - 1 \right)}$$

Equation 1. Equation used to calculate the volume fraction ( $\varphi_v$ ) function of matrix density ( $\rho_m$ ), particle density ( $\rho_p$ ) and weight fraction ( $\varphi_w$ ).

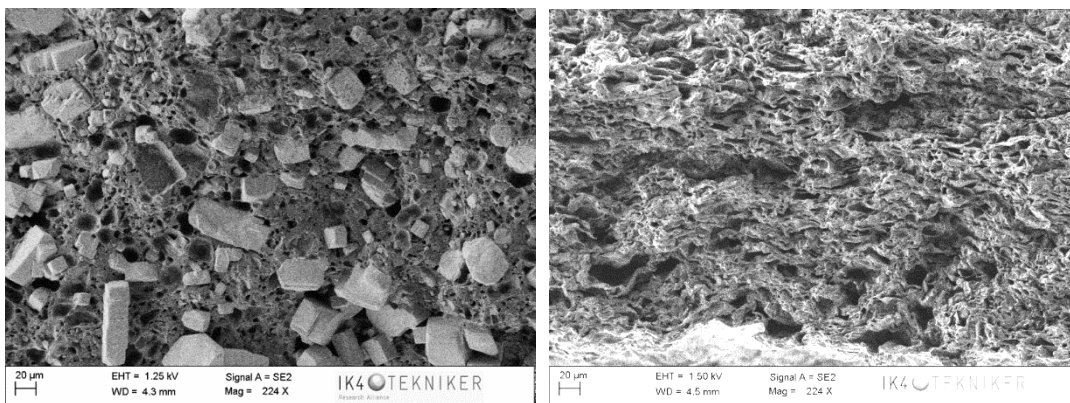

**Figure S2.** Sample 005050 containing 50 wt.% of salt in 0–50 μm range; non leached (left), leached (right).

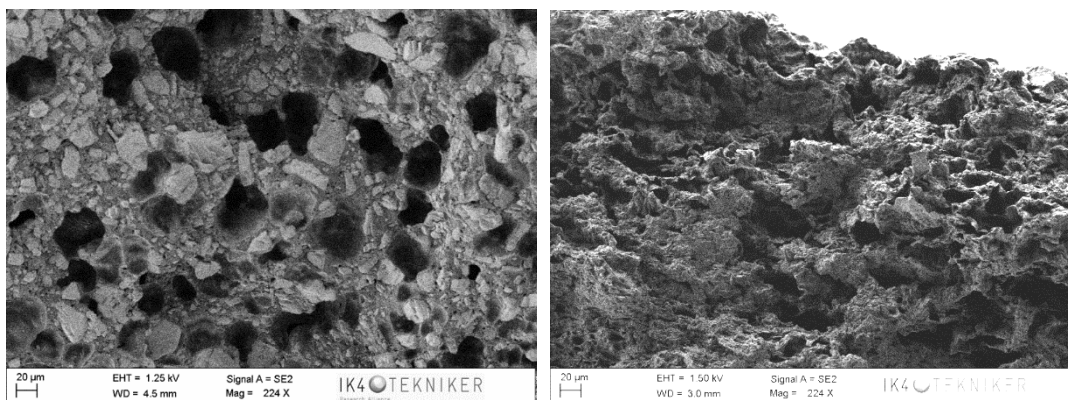

**Figure S3.** Sample 005060 containing 60 wt.% of salt in 0–50  $\mu\text{m}$  range; non leached (left), leached (right).

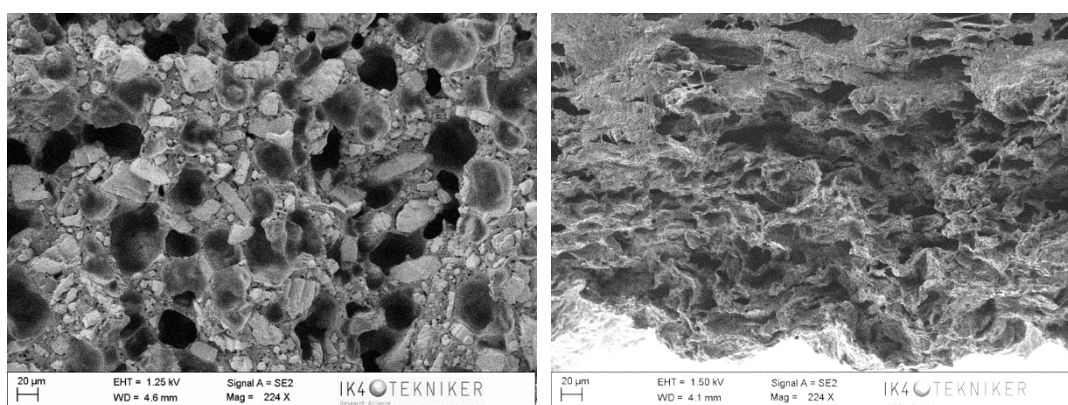

**Figure S4.** Sample 005070 containing 70 wt.% of salt in 0–50  $\mu\text{m}$  range; non leached (left), leached (right).

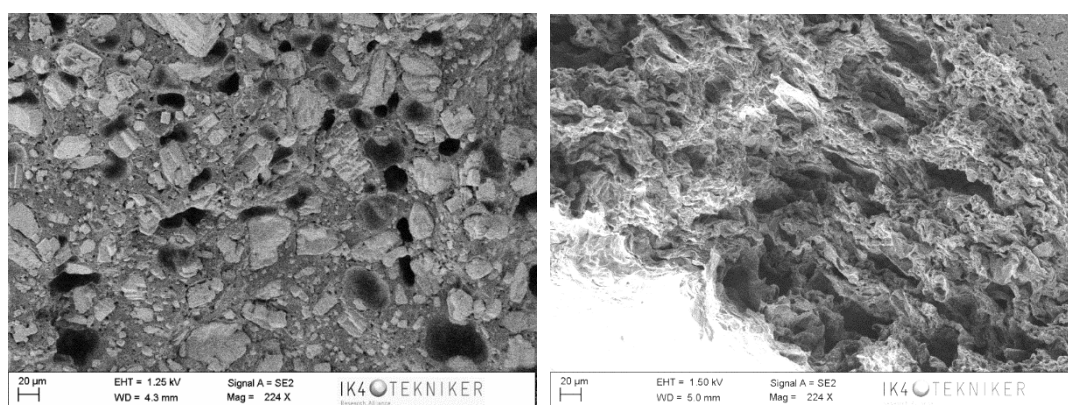

**Figure S5.** Sample 255050 containing 50 wt.% salt in 25–50  $\mu\text{m}$  range; non leached (left), leached (right).

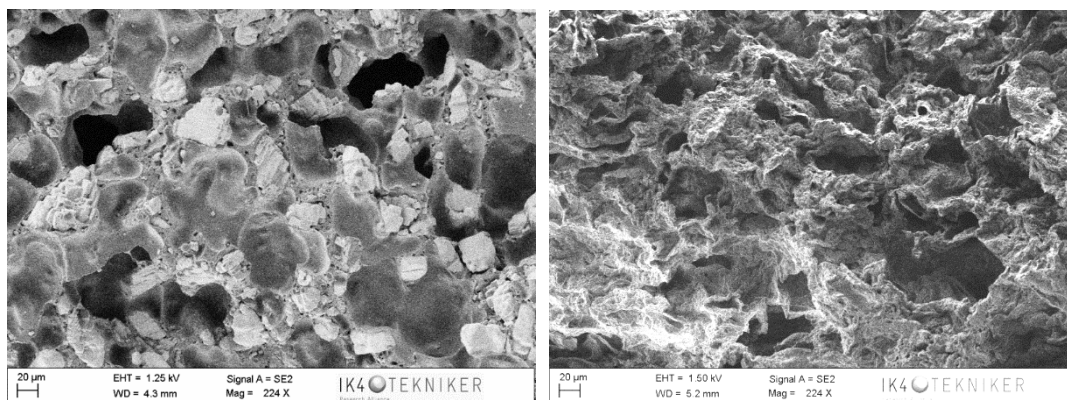

**Figure S6.** Sample 255060 containing 60 wt.% of salt in 25–50 range; non leached (left), leached (right).

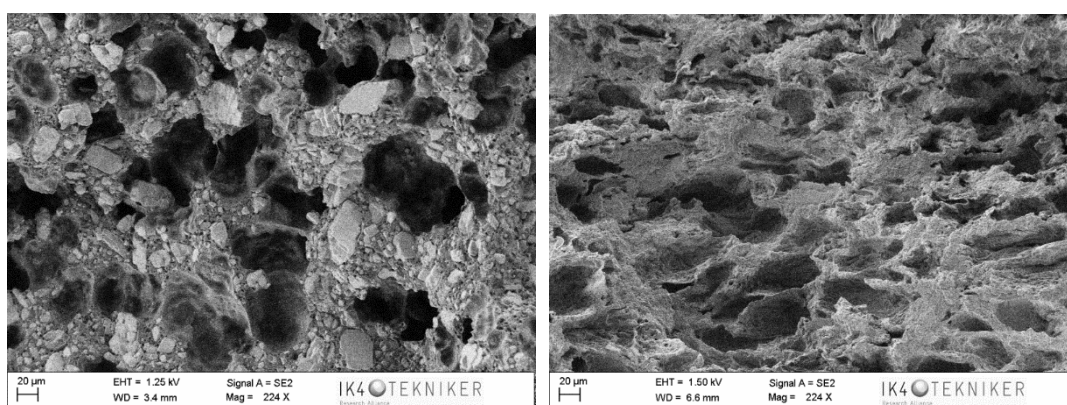

**Figure S7.** Sample 255070 containing 70 wt.% of salt in 25–50  $\mu\text{m}$  range; non leached (left), leached (right).

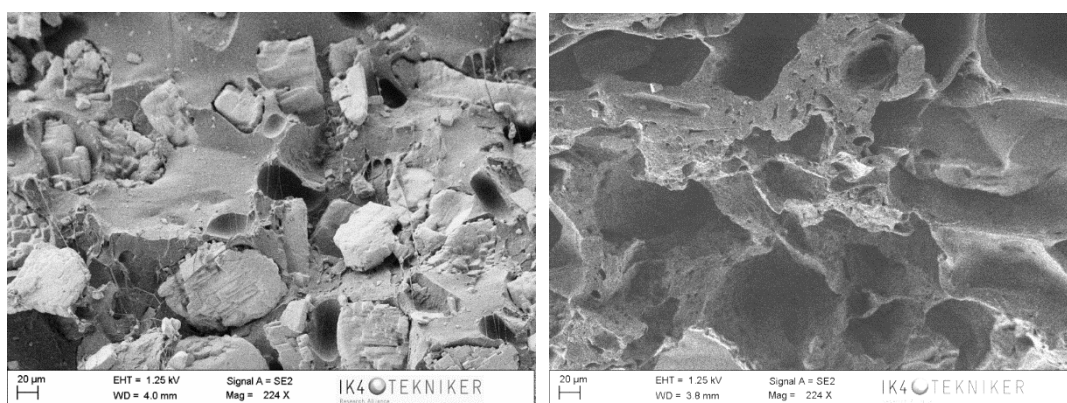

**Figure S8.** Sample 501050 containing 50 wt.% of salt in 50–100  $\mu\text{m}$  range; non leached (left), leached (right).

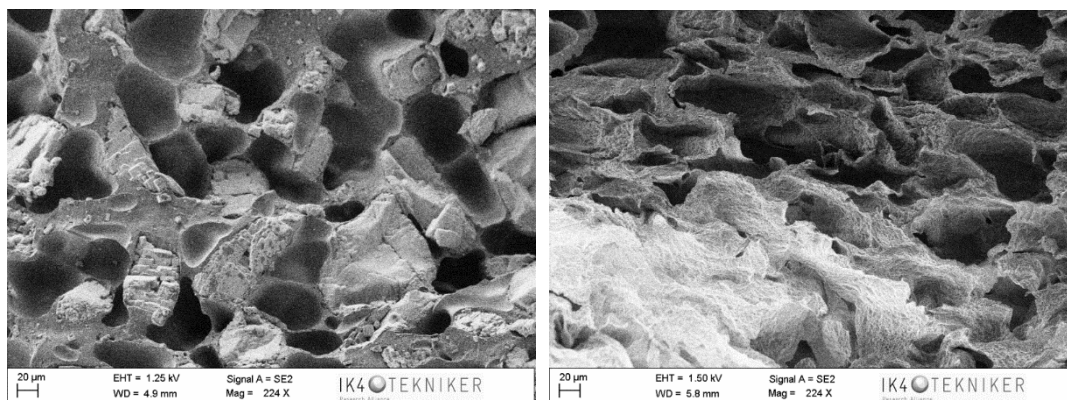

**Figure S9.** Sample 501060 containing 60 wt.% of salt in 50–100 μm range; non leached (left), leached (right).

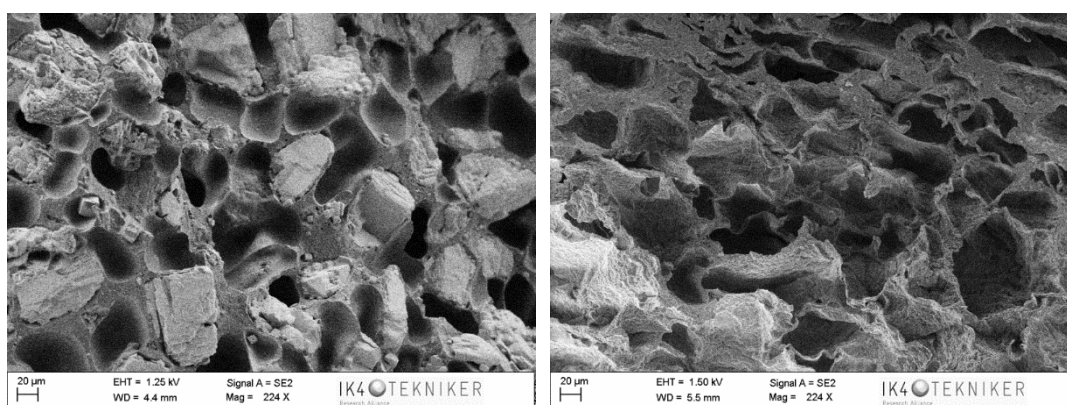

**Figure S10.** Sample 501070 containing 70 wt.% salt in 50–100 μm range; non leached (left), leached (right).

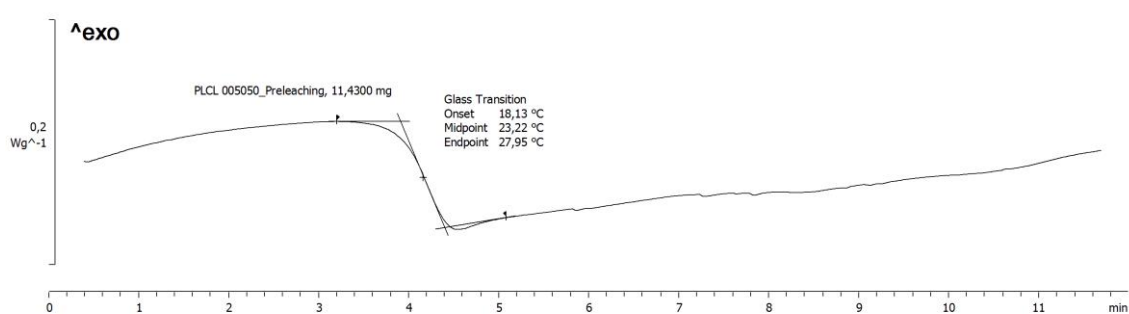

**Figure S11.** DSC curve of non leached sample 005050 containing 50 wt.% salt in 0–50 μm range, exothermic upwards.

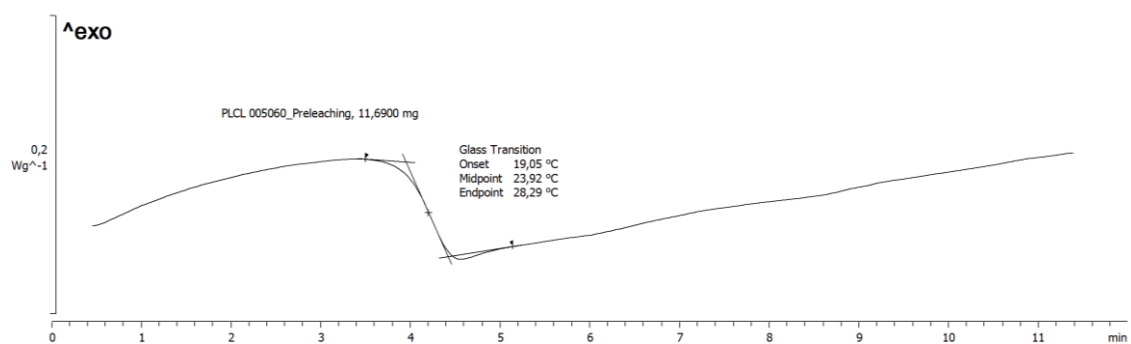

**Figure S12.** DSC curve of non leached sample 005060 containing 60 wt.% salt in 0–50 µm range, exothermic upwards.

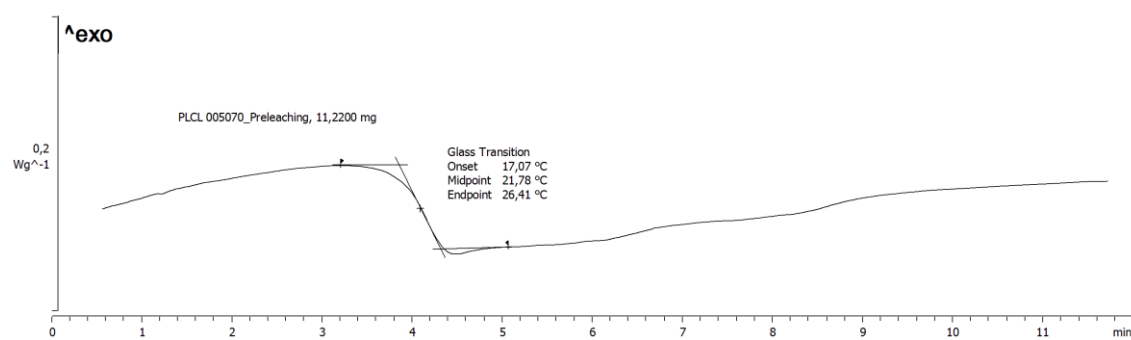

**Figure S13.** DSC curve of non leached sample 005070 containing 70 wt.% salt in 0–50 µm range, exothermic upwards.

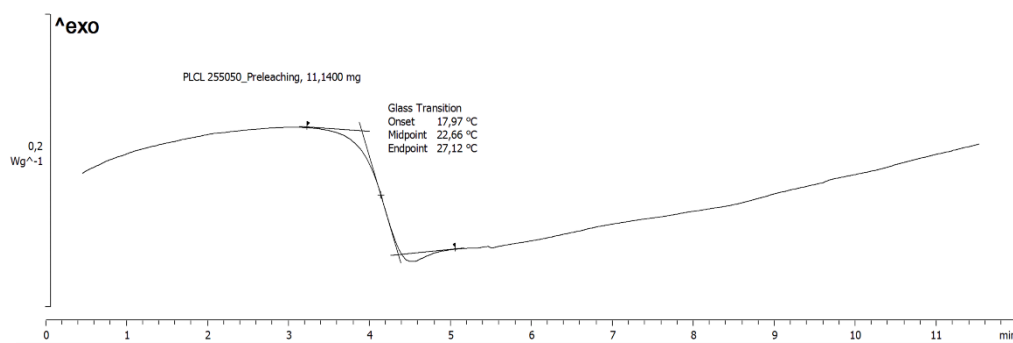

**Figure S14.** DSC curve of non leached sample 255050 containing 50 wt.% salt in 25–50 µm range, exothermic upwards.

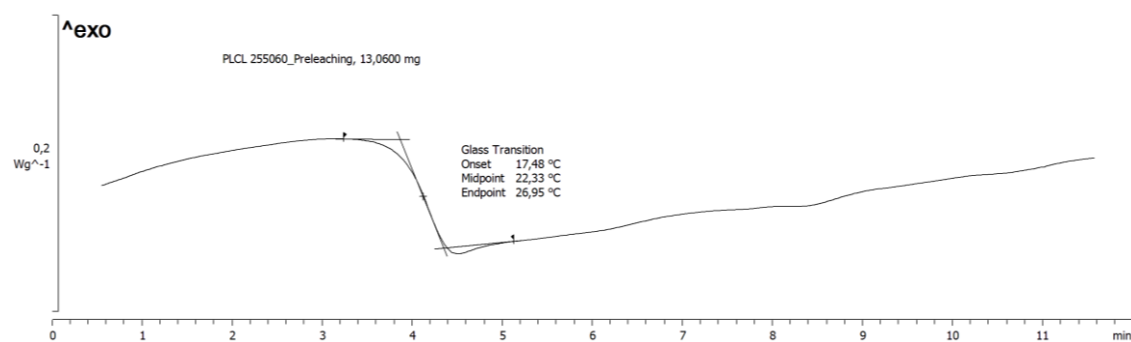

**Figure S15.** DSC curve of non leached sample 255060 containing 60 wt.% salt in 25–50 µm range, exothermic upwards.

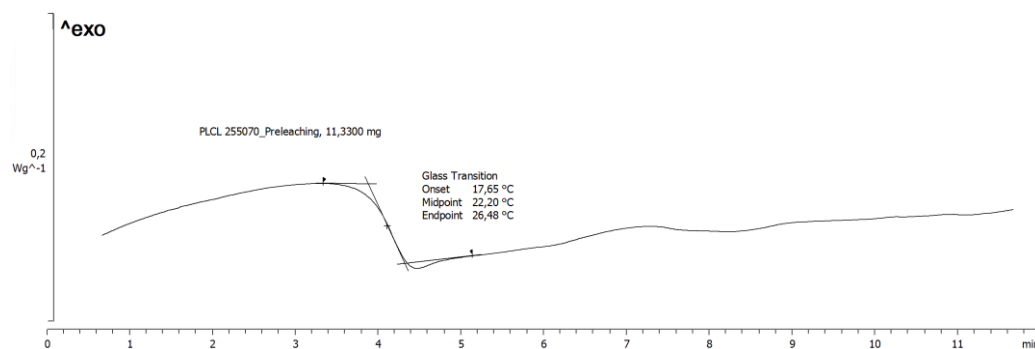

**Figure S16.** DSC curve of non leached sample 255070 containing 70 wt.% salt in 25–50  $\mu\text{m}$  range, exothermic upwards.

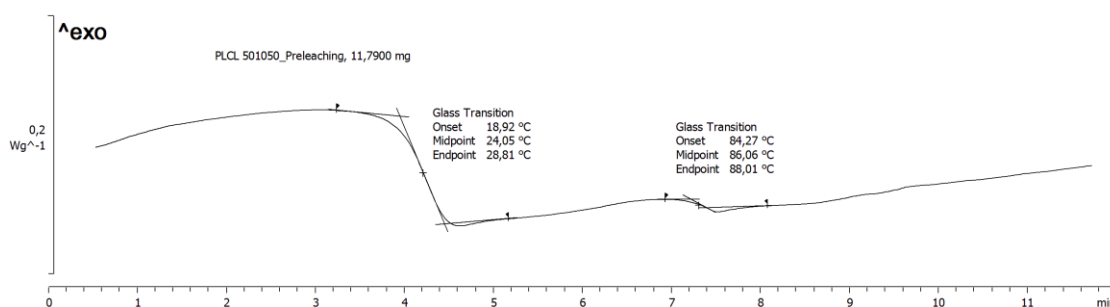

**Figure S17.** DSC curve of non leached sample 501050 containing 50 wt.% salt in 50–100  $\mu\text{m}$  range, exothermic upwards.

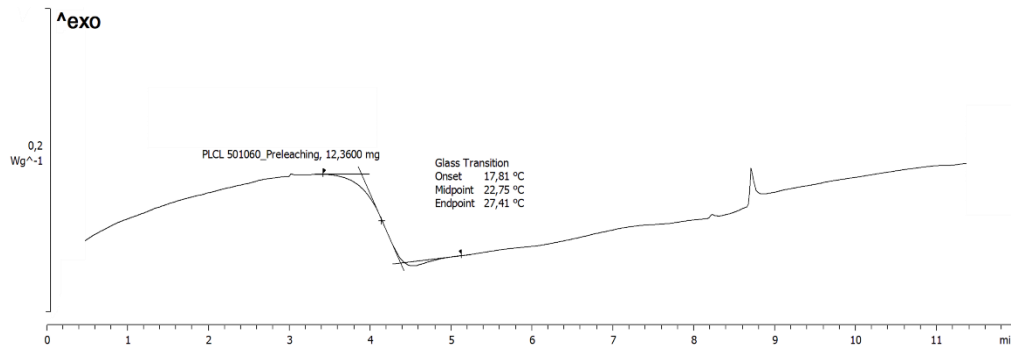

**Figure S18.** DSC curve of non leached sample 501060 containing 60 wt.% salt in 50–100  $\mu\text{m}$  range, exothermic upwards.

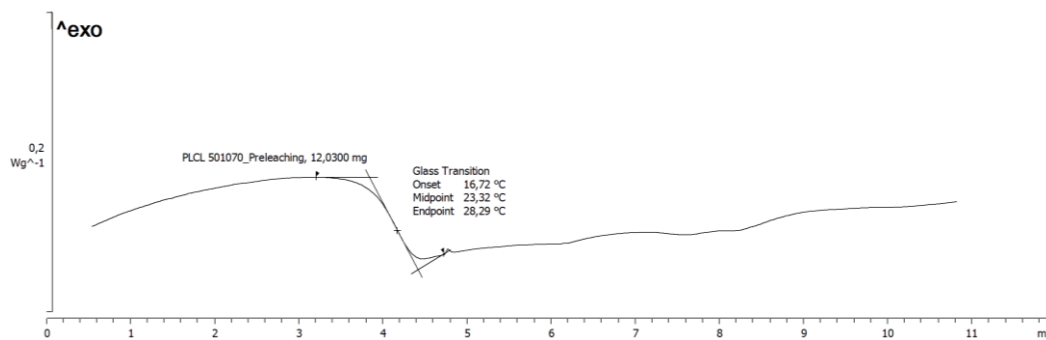

**Figure S19.** DSC curve of non leached sample 501070 containing 70 wt.% salt in 50–100  $\mu\text{m}$  range, exothermic upwards.

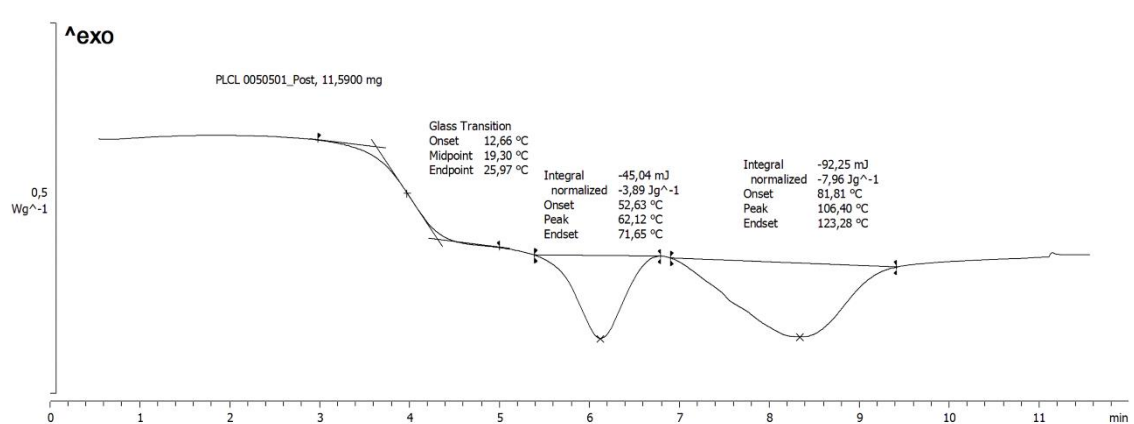

Figure S20. DSC curve of leached sample 005050 containing 50 wt.% salt in 0–50 µm range, exothermic upwards.

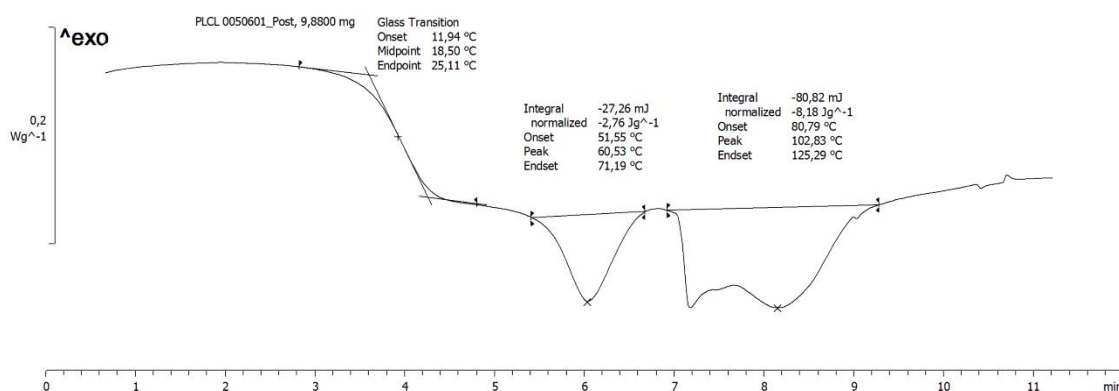

Figure S21. DSC curve of leached sample 005060 containing 60 wt.% salt in 0–50 µm range, exothermic upwards.

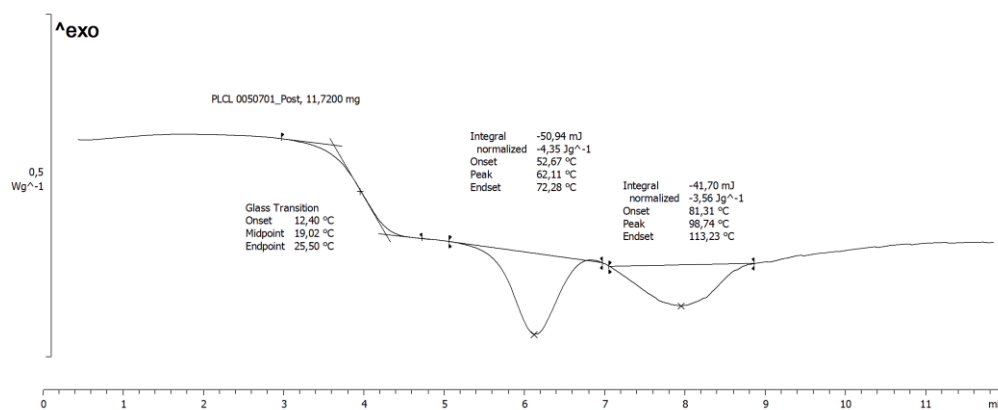

Figure S22. DSC curve of leached sample 005070 containing 70 wt.% salt in 0–50 µm range, exothermic upwards.

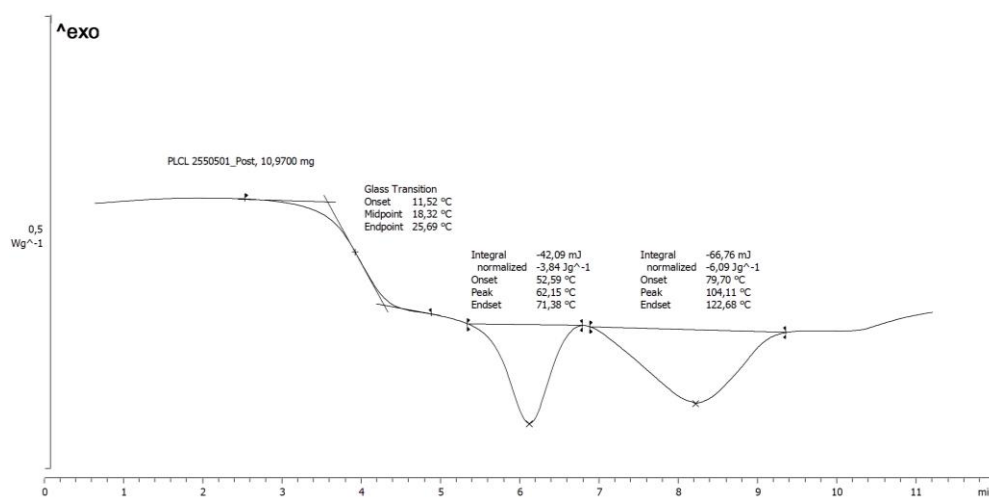

**Figure S23.** DSC curve of leached sample 255050 containing 50 wt.% salt in 25–50  $\mu\text{m}$  range, exothermic upwards.

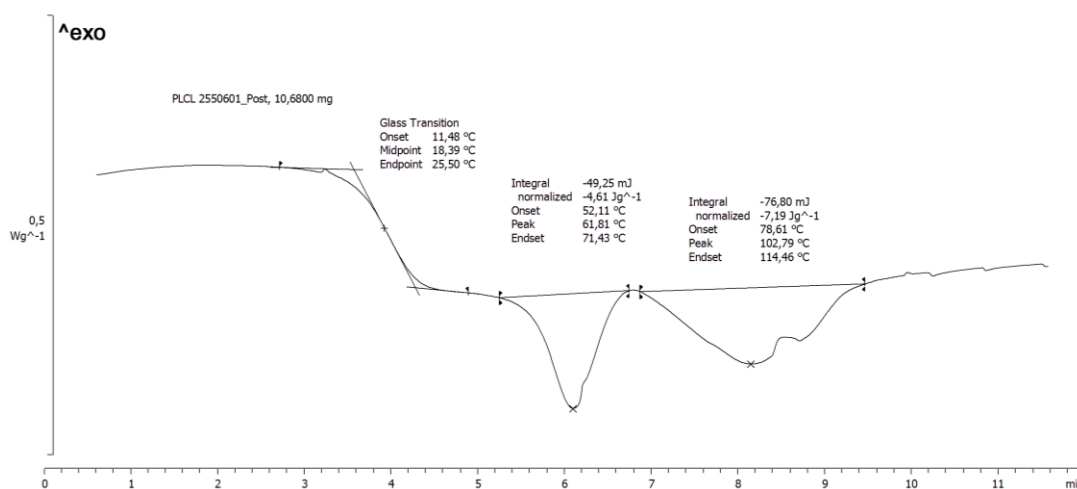

**Figure S24.** DSC curve of leached sample 255060 containing 60 wt.% salt in 25–50  $\mu\text{m}$  range, exothermic upwards.

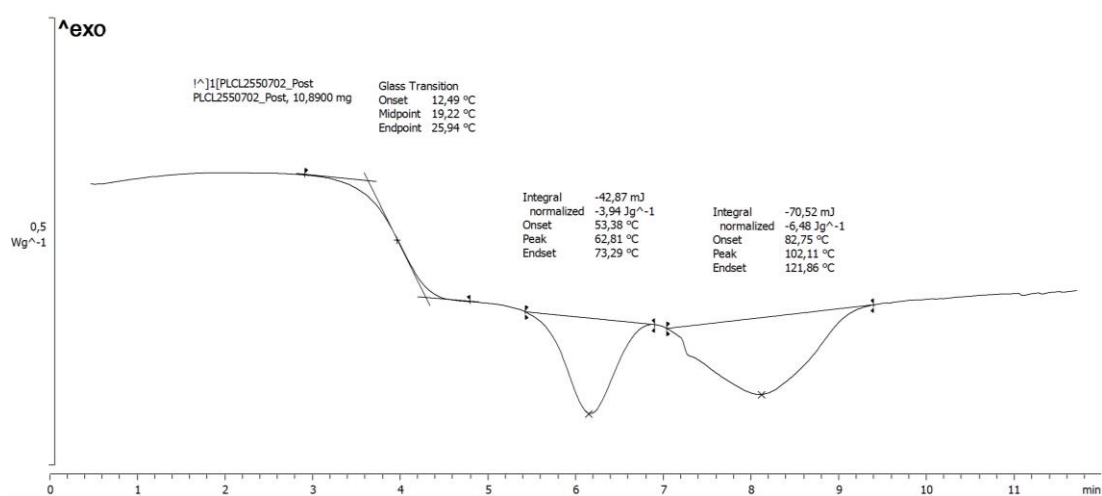

**Figure S25.** DSC curve of leached sample 255070 containing 70 wt.% salt in 25–50  $\mu\text{m}$  range, exothermic upwards.



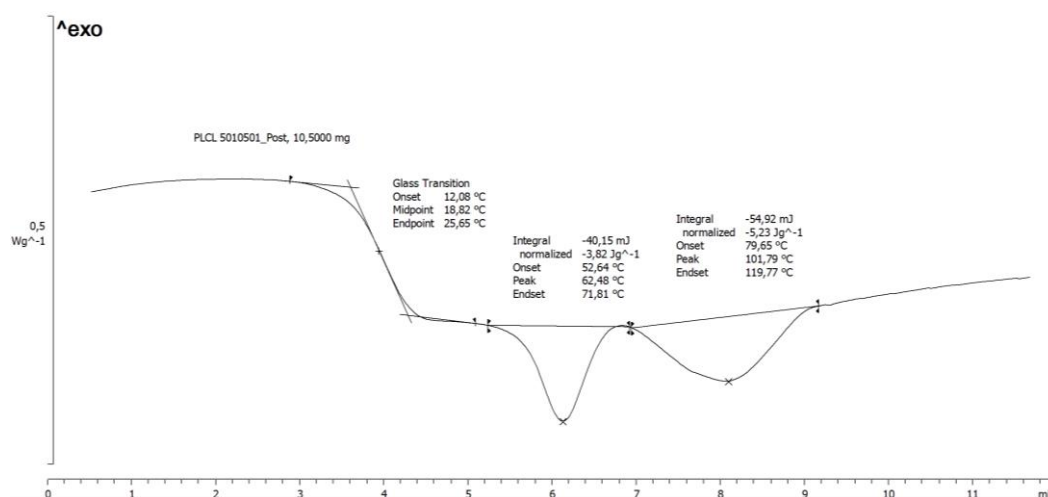

Figure S26. DSC curve of leached sample 501050 containing 50 wt.% salt in 50–100  $\mu\text{m}$  range, exothermic upwards.

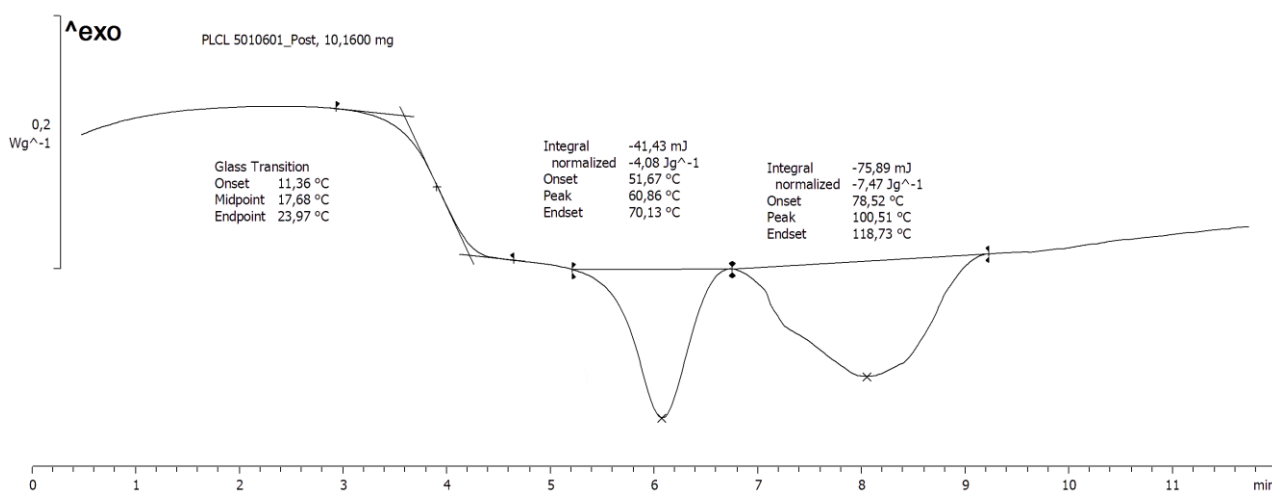

Figure S27. DSC curve of leached sample 501060 containing 60 wt.% salt in 50–100  $\mu\text{m}$  range, exothermic upwards.

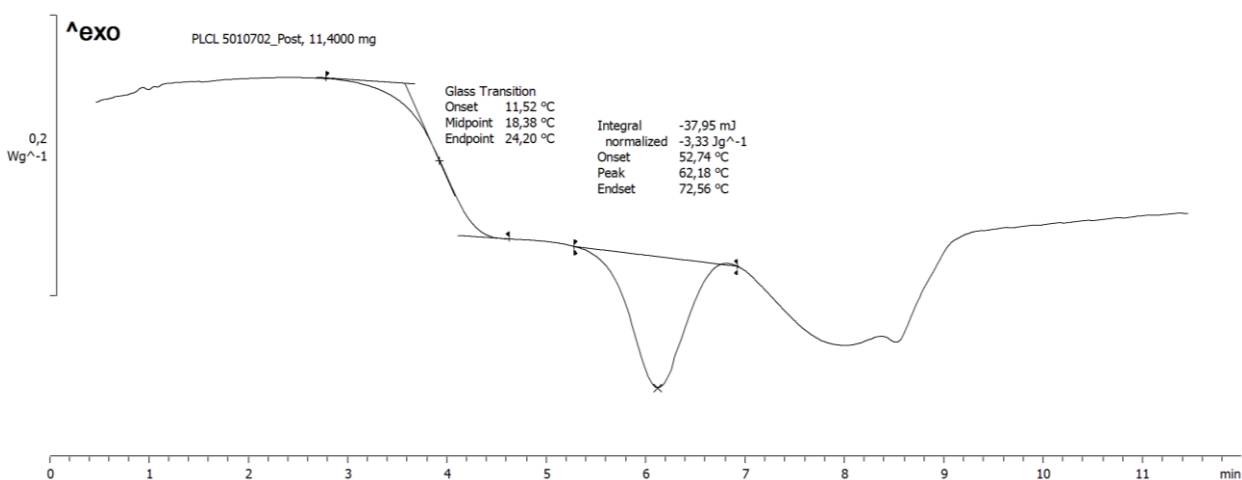

Figure S28. DSC curve of leached sample 501070 containing 70 wt.% salt in 50–100  $\mu\text{m}$  range, exothermic upwards.

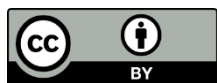

© 2019 by the authors. Submitted for possible open access publication under the terms and conditions of the Creative Commons Attribution (CC BY) license (<http://creativecommons.org/licenses/by/4.0/>).
